# Supplementary material for: Molecular imaging of a fluorescent antibody against epidermal growth factor receptor detects high-grade glioma
Source: PubMed Central journal article supplement (PMC7952570; doi:10.1038/s41598-021-84831-4), 2021-03-11

## **Supplementary information**

### **Title**

Molecular imaging of a fluorescent antibody against epidermal growth factor receptor detects high-grade glioma

### **Authors**

Quan Zhou, PhD<sup>1,2</sup>, Johana C. M. Vega Leonel, PhD<sup>1</sup>, Michelle R. Santoso, BS<sup>3</sup>, Christy Wilson, PhD<sup>1</sup>, Nynke S. van den Berg, PhD<sup>2</sup>, Carmel T. Chan, PhD<sup>4</sup>, Muna Aryal, PhD<sup>4</sup>, Hannes Vogel, MD<sup>5</sup>, Romain Cayrol, MD, PhD<sup>5</sup>, Michael J. Mandella, PhD<sup>4,6</sup>, Frank Schonig, BS<sup>6</sup>, Guolan Lu, PhD<sup>2</sup>, Sanjiv S. Gambhir, MD, PhD<sup>4</sup>, Michael E. Moseley, PhD<sup>4</sup>, Eben L. Rosenthal, MD<sup>2,7</sup>, Gerald A. Grant, MD<sup>1\*</sup>

**Supplementary Table S1.** Demographic and diagnostic information on high-grade glioma (HGG) cases

| patient# | Sex | Age (year) <sup>a</sup> | Size (cm) <sup>b</sup> | Location              | Diagnosis               | WHO Grading | EGFR IHC Grade <sup>c</sup> | EGFR gene amplification <sup>d</sup> | P53 abnormality <sup>d</sup> | IDH1 mutation <sup>d</sup> |
|----------|-----|-------------------------|------------------------|-----------------------|-------------------------|-------------|-----------------------------|--------------------------------------|------------------------------|----------------------------|
| 1        | F   | 9W                      | 9.5                    | left hemisphere       | glioblastoma multiforme | IV          | -ve                         | —                                    | —                            | X                          |
| 2        | F   | 9M                      | 6.2                    | brain stem            | glioblastoma multiforme | IV          | -ve (n=2) <sup>e</sup>      | O                                    | X                            | —                          |
| 3        | F   | 12 (D)                  | 3.5                    | right frontal lobe    | glioblastoma multiforme | IV          | 2.5+                        | O                                    | X                            | O                          |
| 4        | M   | 15                      | 5.4                    | right frontal lobe    | glioblastoma multiforme | IV          | 1+                          | O                                    | X                            | O                          |
| 5        | M   | 15 (D)                  | 5.2                    | right frontal lobe    | glioblastoma multiforme | IV          | 3.5+                        | X                                    | —                            | O                          |
| 6        | M   | 17 (D)                  | 4.2                    | left temporal lobe    | glioblastoma multiforme | IV          | 2+                          | —                                    | X                            | O                          |
| 7        | F   | 41                      | 5.1                    | right frontal lobe    | glioblastoma multiforme | IV          | 3+                          | —                                    | O                            | O                          |
| 8        | M   | 45                      | 1.5                    | right temporal lobe   | glioblastoma multiforme | IV          | 3+ (n=3)                    | —                                    | X                            | O                          |
| 9        | M   | 55 (D)                  | 5.3                    | left temporal lobe    | glioblastoma multiforme | IV          | 3+ (n=3)                    | X                                    | X                            | O                          |
| 10       | F   | 60                      | 4.4                    | right frontal lobe    | glioblastoma multiforme | IV          | 3+ (n=3)                    | —                                    | —                            | O                          |
| 11       | F   | 67                      | 3.6                    | left parietal lobe    | glioblastoma multiforme | IV          | 3+ (n=3)                    | —                                    | —                            | O                          |
| 12       | F   | 67                      | 5.8                    | left parietal lobe    | glioblastoma multiforme | IV          | 4+ (n=3)                    | X <sup>f</sup>                       | O                            | O                          |
| 13       | M   | 68                      | 5.0                    | right frontal lobe    | glioblastoma multiforme | IV          | 4+ (n=3)                    | —                                    | —                            | —                          |
| 14       | M   | 4                       | 1.0                    | left occipital lobe   | anaplastic ependymoma   | III         | 3+                          | O                                    | O                            | —                          |
| 15       | F   | 5 (D)                   | 4.0                    | right frontal lobe    | anaplastic ependymoma   | III         | 4+ (n=3)                    | O                                    | O                            | —                          |
| 16       | F   | 6 (D)                   | 1.6                    | right frontal lobe    | anaplastic ependymoma   | III         | 2+                          | —                                    | —                            | —                          |
| 17       | F   | 10                      | 4.5                    | left frontal lobe     | anaplastic ependymoma   | III         | 1+                          | O                                    | O                            | —                          |
| 18       | M   | 15                      | 5.0                    | posterior fossa       | anaplastic ependymoma   | III         | 1+                          | O                                    | O                            | O                          |
| 19       | M   | 17                      | 5.8                    | right temporoparietal | anaplastic ependymoma   | III         | 4+                          | —                                    | O                            | O                          |

|    |   |         |      |                        |                                  |     |           |   |   |   |
|----|---|---------|------|------------------------|----------------------------------|-----|-----------|---|---|---|
| 20 | M | 7M      | 4.0  | posterior fossa        | atypical teratoid rhabdoid tumor | IV  | -ve (n=2) | O | X | — |
| 21 | F | 10M (D) | 8.0  | right parietal lobe    | atypical teratoid rhabdoid tumor | IV  | 2+        | — | X | — |
| 22 | M | 1 (D)   | 6.4  | posterior fossa        | atypical teratoid rhabdoid tumor | IV  | 2+        | — | — | — |
| 23 | M | 1       | 5.1  | right frontal lobe     | atypical teratoid rhabdoid tumor | IV  | 3+        | — | — | — |
| 24 | M | 4 (D)   | 8.7  | left lateral ventricle | atypical teratoid rhabdoid tumor | IV  | 2+        | — | — | — |
| 25 | F | 5 (D)   | 3.5  | cerebellum             | atypical teratoid rhabdoid tumor | IV  | 3+        | — | — | — |
| 26 | F | 5       | 5.2  | posterior fossa        | medulloblastoma                  | IV  | -ve (n=3) | O | O | — |
| 27 | M | 11      | 4.4  | posterior fossa        | medulloblastoma                  | IV  | -ve (n=3) | — | O | — |
| 28 | M | 10 (D)  | 3.4  | right thalamus         | diffuse midline glioma           | IV  | 4+        | O | X | — |
| 29 | F | 12      | 3.8  | left thalamus          | diffuse midline glioma           | IV  | -ve       | O | X | — |
| 30 | F | 14 (D)  | 6.0  | spine                  | diffuse midline glioma           | IV  | 1+        | O | X | O |
| 31 | F | 4 (D)   | 11.2 | left frontal lobe      | ganglioneuroblastoma             | IV  | -ve       | O | O | — |
| 32 | F | 8       | 8.2  | left parietal lobe     | anaplastic ganglioglioma         | III | -ve       | — | — | — |
| 33 | F | 11      | 4.0  | right thalamus         | anaplastic astrocytoma           | III | 4+        | O | X | O |
| 34 | M | 42 (D)  | 5.0  | left frontal lobe      | anaplastic oligodendroglioma     | III | 2+ (n=3)  | O | O | X |
| 35 | M | 49      | 2.3  | left frontal lobe      | pleomorphic glial neoplasm       | IV  | 4+ (n=3)  | O | O | O |

<sup>a</sup> Age at time of surgical procedure, in years unless under 12 months (W: week; M: month). D: deceased as of Oct 2019

<sup>b</sup> Largest dimension measured on presurgical MRI

<sup>c</sup> Consensus of two pathologist, one sample (n=1) per patient unless specified otherwise

<sup>d</sup> X: positive test result; O: negative test result; —: not tested

<sup>e</sup> Focally 4+ EGFR positive tumor cells found in one of two sample

<sup>f</sup> Two EGFR-SEPT14 fusion events found in the sequencing data in addition to EGFR amplification

**Supplementary Figure S1.** Panitumumab-IRDye800 competition assay on U251 glioma cell line. U251 cells were incubated with panitumumab-IRDye800 (5nM) and increasing concentrations of unlabeled panitumumab from **A**, 0.05nM to **G**, 5 $\mu$ M. **H**, Fluorescence intensity (Mean  $\pm$  SEM) decreased as unlabeled panitumumab concentration increased. The half maximal inhibitory concentration (IC<sub>50</sub>) was 43.6 nM.

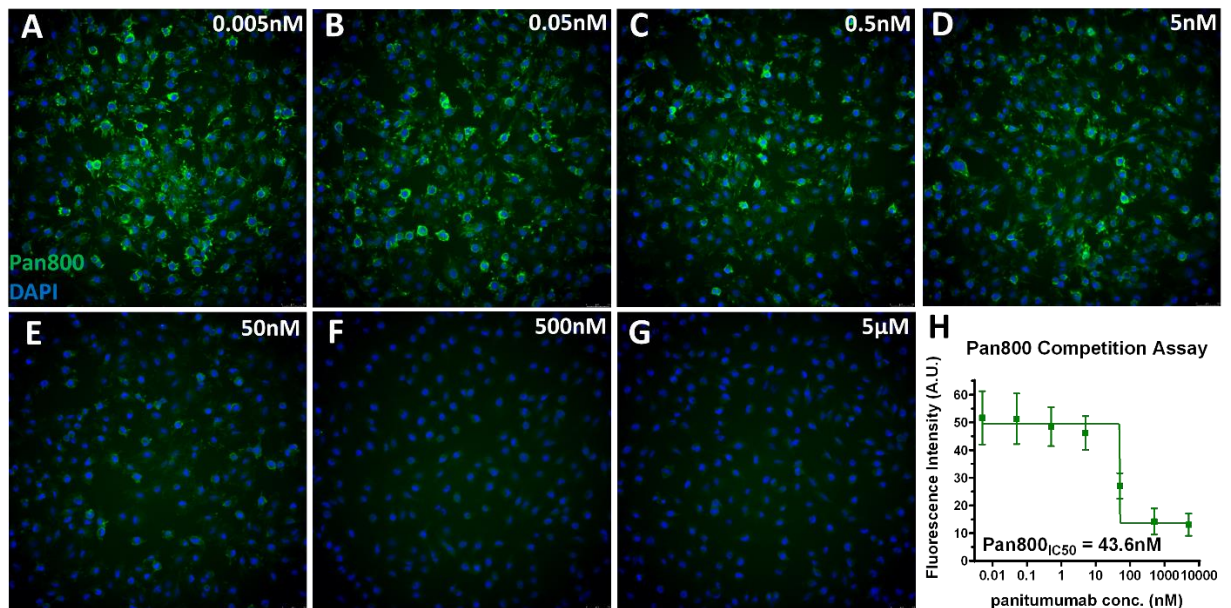

**Supplementary Figure S2.** Quantification algorithm segments positive immunohistochemical staining. **A**, EGFR and **B**, claudin-5 (Cldn5) immunohistochemical (IHC) staining results were segmented into positive and negative pixels according to staining intensity. *Lower panels:* a quantification mask is applied to each pixel of IHC images above with the color code of blue (negative), yellow (weakly positive), orange (medium positive) and red (strongly positive).

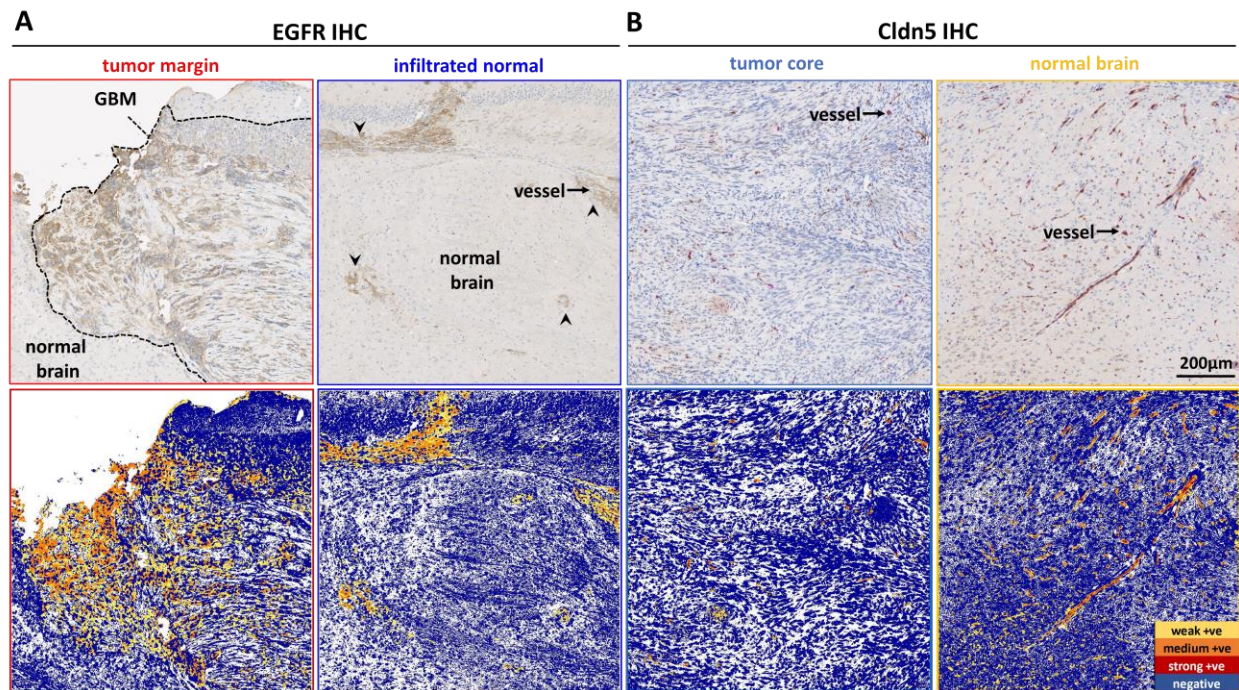

Supplement: 41598_2021_84831_MOESM1_ESM.pdf [file 41598_2021_84831_MOESM1_ESM.pdf]
